# Supplementary material for: Reevaluation of Performance of Electric Double-layer Capacitors from Constant-current Charge/Discharge and Cyclic Voltammetry
Source: PubMed Central journal article supplement (PMC5146949; doi:10.1038/srep38568), 2016-12-09
Supplement: srep38568-s1.pdf [file srep38568-s1.pdf]

# Reevaluation of Performance of Electric Double-layer Capacitors from Constant Current Charge/Discharge and Cyclic Voltammetry

Anis Allagui<sup>1,2,\*</sup>, Todd J. Freeborn<sup>3</sup>, Ahmed S. Elwakil<sup>4,5</sup>, and Brent J. Maundy<sup>6</sup>

<sup>1</sup>Dept. of Sustainable and Renewable Energy Engineering, University of Sharjah, PO Box 27272, Sharjah, UAE

<sup>2</sup>Center for Advanced Materials Research, University of Sharjah, PO Box 27272, Sharjah, UAE

<sup>3</sup>Dept. of Electrical and Computer Engineering, University of Alabama, PO Box 870286, Tuscaloosa, USA

<sup>4</sup>Dept. of Electrical and Computer Engineering, University of Sharjah, PO Box 27272, Sharjah, UAE

<sup>5</sup>Nanoelectronics Integrated Systems Center (NISC), Nile University, Cairo, Egypt

<sup>6</sup>Dept. of Electrical and Computer Engineering, University of Calgary, Alberta, Canada

\*aallagui@sharjah.ac.ae

## SUPPORTING INFORMATION

### FFT of Constant-current Charge/Discharge and Linear Voltage Waveforms

We used the fast Fourier transform (FFT) algorithm of Matlab for the computation of estimate component frequencies in the discrete data of:

1. current charge and discharge in the galvanostatic test (see figure [S1](#)), and
2. voltage scan waveform in the voltammetric test (see figure [S2](#)).

The window length was set to 2048 data points.

### Calculation of EDLCs Metrics from $R_s$ -CPE Model

The nonlinear least-squares minimization for data fitting was carried out using Matlab's `lsqcurvefit` function with Trust-Region-Reflective (TRR) algorithm. The fitting routine attempts to numerically solve the problem:

$$\min_x f_0(x) = \sum_{i=1}^n [f(x_i; R_s, Q, \alpha) - y_i]^2 ; \quad R_s, Q, \alpha > 0 \quad (S1)$$

where  $(R_s, Q, \alpha)$  constitutes the set of characteristic parameters to minimize the function  $f_0(x)$ ,  $f(x_i; R_s, Q, \alpha)$  is the fitting function (equation 7 for constant-current charge/discharge and equation 22 for linear voltage sweep) evaluated at  $x_i$ ,  $y_i$  is the measured response at  $x_i$ , and  $n$  is the total number of collected data points. A constraint is added to the problem to limit the possible solutions for the resistance and pseudocapacitance to real positive values. Also, a negative value of the dispersion coefficient  $\alpha$  indicates inductive characteristics which is not considered here. The code was configured to use Matlab's `MultiStart` with 50 iterations to find the global solution of  $(R_s, Q, \alpha)$ .

The extracted values of  $(R_s, Q, \alpha)$  satisfying equation 7 for galvanostatic charge/discharge are shown summarized in tables [S1](#) and [S2](#) for PS and NEC EDLCs respectively. Similarly, the extracted values of  $(R_s, Q, \alpha)$  satisfying equation 22 for linear voltage scans are shown summarized in tables [S3](#) and [S4](#) for PS and NEC EDLCs respectively. The average capacitance from the  $R_s$ -CPE (denoted  $C_{\text{eff}}$ ) is compared with the average capacitance calculated from the standard  $R_sC$  model for both techniques.

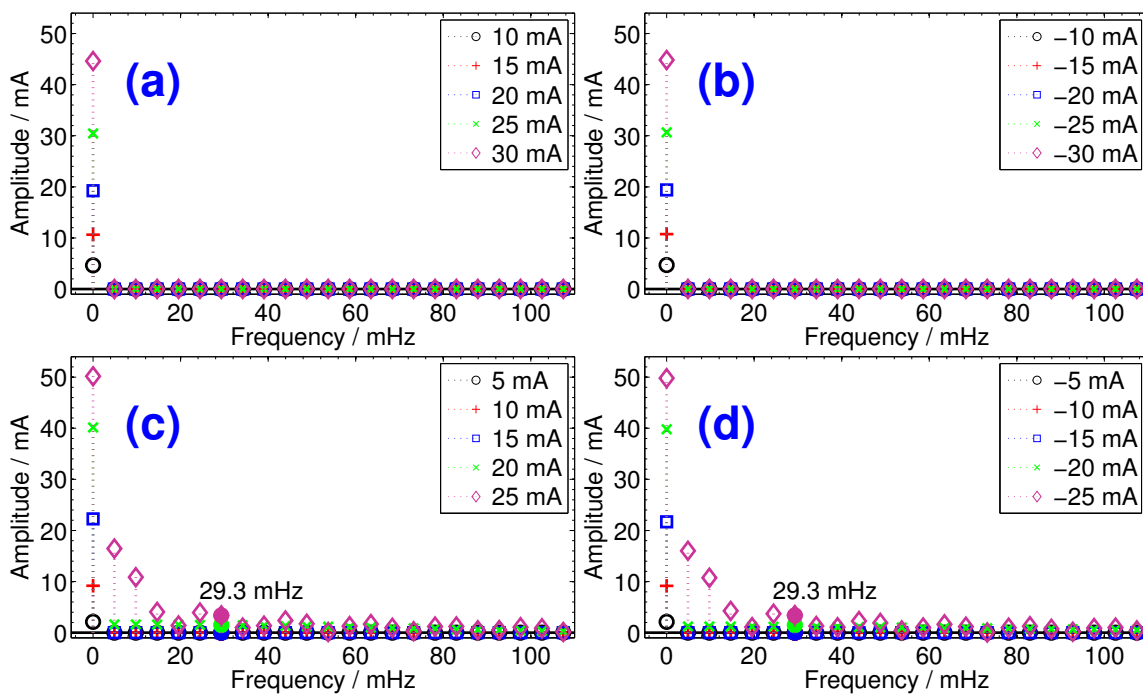

**Figure S1.** Amplitude spectrum of current waveforms calculated using discrete Fourier transform over a window of 2048 points for PS ((a) & (b) for charge/discharge) and NEC ((c) & (d) for charge/discharge) ECDLs

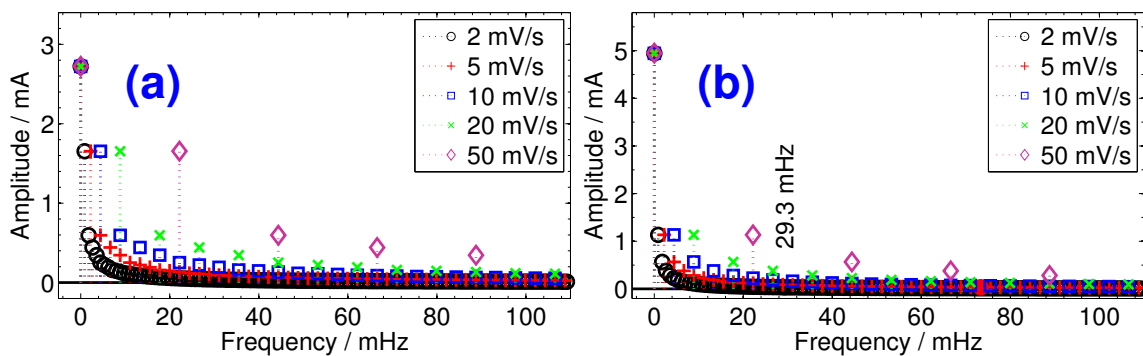

**Figure S2.** Amplitude spectrum of voltage waveforms calculated using discrete Fourier transform over a window of 2048 points for PS (a) and NEC (b) ECDLs during linear scan voltammetry

**Table S1.** Extracted set of parameters ( $R_s, Q, \alpha$ ) from  $\pm 10, 15, \dots, 30$  mA charge/discharge waveforms of the PS EDLC using nonlinear least-squares optimization with equation 7. The average capacitance from the  $R_s$ -CPE ( $C_{\text{eff}}$ , calculated using eq. 9) is compared with the average capacitance calculated from the standard  $R_sC$  model (eq. 1) over (i) the full voltage window and (ii) 20 to 80% the nominal voltage

| $I_{\text{cc}} / \text{mA}$ | $R_sC$ model (eq. 1) |                | $R_s$ -CPE model (eq. 7) |                             |          |                      | $C_{\text{eff}}$ (eq. 9) / F |
|-----------------------------|----------------------|----------------|--------------------------|-----------------------------|----------|----------------------|------------------------------|
|                             | C / F                | C (20-80%) / F | $R_s / \Omega$           | $Q / \text{F s}^{\alpha-1}$ | $\alpha$ | Norm of the Residual |                              |
| 10.00                       | 3.27                 | 3.31           | 0.00                     | 1.11                        | 0.84     | 0.87                 | 3.25                         |
| 15.00                       | 3.21                 | 3.25           | 0.00                     | 1.10                        | 0.83     | 0.65                 | 3.18                         |
| 20.00                       | 3.15                 | 3.19           | 0.00                     | 1.11                        | 0.83     | 0.57                 | 3.13                         |
| 25.00                       | 3.11                 | 3.15           | 0.00                     | 1.12                        | 0.83     | 0.53                 | 3.08                         |
| 30.00                       | 3.06                 | 3.09           | 0.00                     | 1.15                        | 0.83     | 0.45                 | 3.03                         |
| -10.00                      | 3.23                 | 3.33           | 0.82                     | 3.30                        | 1.00     | 2.73                 | 3.30                         |
| -15.00                      | 3.18                 | 3.28           | 1.08                     | 3.24                        | 1.00     | 1.21                 | 3.24                         |
| -20.00                      | 3.13                 | 3.22           | 0.97                     | 3.19                        | 1.00     | 0.67                 | 3.19                         |
| -25.00                      | 3.09                 | 3.18           | 0.82                     | 3.15                        | 1.00     | 0.43                 | 3.15                         |
| -30.00                      | 3.05                 | 3.13           | 0.68                     | 3.10                        | 1.00     | 0.30                 | 3.10                         |

**Table S2.** Extracted set of parameters ( $R_s, Q, \alpha$ ) from  $\pm 5, 10, \dots, 25$  mA charge/discharge waveforms of the NEC EDLC using nonlinear least-squares optimization with equation 7. The average capacitance from the  $R_s$ -CPE ( $C_{\text{eff}}$ , calculated using eq. 9) is compared with the average capacitance calculated from the standard  $R_sC$  model (eq. 1) over (i) the full voltage window and (ii) 20 to 80% the nominal voltage

| $I_{\text{cc}} / \text{mA}$ | $R_sC$ model (eq. 1) |                | $R_s$ -CPE model (eq. 7) |                             |          |                      | $C_{\text{eff}}$ (eq. 9) / F |
|-----------------------------|----------------------|----------------|--------------------------|-----------------------------|----------|----------------------|------------------------------|
|                             | C / F                | C (20-80%) / F | $R_s / \Omega$           | $Q / \text{F s}^{\alpha-1}$ | $\alpha$ | Norm of the Residual |                              |
| 5.00                        | 0.89                 | 0.90           | 0.00                     | 0.26                        | 0.82     | 2.91                 | 0.88                         |
| 10.00                       | 0.83                 | 0.86           | 10.10                    | 0.31                        | 0.83     | 1.00                 | 0.85                         |
| 15.00                       | 0.79                 | 0.82           | 12.79                    | 0.33                        | 0.84     | 0.53                 | 0.82                         |
| 20.00                       | 0.76                 | 0.80           | 13.53                    | 0.33                        | 0.84     | 0.45                 | 0.80                         |
| 25.00                       | 0.73                 | 0.77           | 13.46                    | 0.33                        | 0.83     | 0.51                 | 0.78                         |
| -5.00                       | 0.90                 | 0.96           | 20.64                    | 0.28                        | 0.83     | 4.60                 | 0.93                         |
| -10.00                      | 0.84                 | 0.90           | 19.42                    | 0.28                        | 0.81     | 1.43                 | 0.88                         |
| -15.00                      | 0.81                 | 0.87           | 17.33                    | 0.28                        | 0.80     | 0.85                 | 0.86                         |
| -20.00                      | 0.78                 | 0.83           | 15.97                    | 0.27                        | 0.79     | 0.73                 | 0.83                         |
| -25.00                      | 0.75                 | 0.79           | 14.89                    | 0.27                        | 0.78     | 0.76                 | 0.81                         |

**Table S3.** Extracted set of parameters ( $R_s, Q, \alpha$ ) using nonlinear least-squares optimization with equation 22 from linear scan voltammetry test of the PS EDLC. The average capacitance from the  $R_s$ -CPE ( $C_{\text{eff}}$ , calculated using eq. 21) is compared with the average capacitance calculated from the standard  $R_sC$  model (eq. 2)

| Scan rate / $\text{mV s}^{-1}$ | $R_s$ -C model (eq. 2) | $R_s$ -CPE model (eq. 22) |                             |          |                      | $C_{\text{eff}}$ (eq. 21) / F |
|--------------------------------|------------------------|---------------------------|-----------------------------|----------|----------------------|-------------------------------|
|                                | C / F                  | $R_s / \Omega$            | $Q / \text{F s}^{\alpha-1}$ | $\alpha$ | Norm of the Residual |                               |
| 2                              | 2.89                   | 0.00                      | 0.70                        | 0.79     | 0.00                 | 2.87                          |
| 5                              | 3.01                   | 0.00                      | 0.86                        | 0.78     | 0.00                 | 2.99                          |
| 10                             | 2.97                   | 0.00                      | 0.95                        | 0.78     | 0.00                 | 2.95                          |
| 20                             | 2.89                   | 0.00                      | 1.12                        | 0.79     | 0.01                 | 2.88                          |
| 50                             | 2.71                   | 0.00                      | 1.42                        | 0.81     | 0.06                 | 2.78                          |

**Table S4.** Extracted set of parameters ( $R_s, Q, \alpha$ ) using nonlinear least-squares optimization with equation 22 from linear scan voltammetry test of the NEC EDLC. The average capacitance from the  $R_s$ -CPE ( $C_{\text{eff}}$ , calculated using eq. 21) is compared with the average capacitance calculated from the standard  $R_sC$  model (eq. 2)

| Scan rate / $\text{mV s}^{-1}$ | $R_s$ -C model (eq. 2) | $R_s$ -CPE model (eq. 22) |                             |          |                      | $C_{\text{eff}}$ (eq. 21) / F |
|--------------------------------|------------------------|---------------------------|-----------------------------|----------|----------------------|-------------------------------|
|                                | C / F                  | $R_s / \Omega$            | $Q / \text{F s}^{\alpha-1}$ | $\alpha$ | Norm of the Residual |                               |
| 2                              | 0.94                   | 0.00                      | 0.29                        | 0.85     | 0.00                 | 0.85                          |
| 5                              | 0.89                   | 0.00                      | 0.34                        | 0.86     | 0.00                 | 0.80                          |
| 10                             | 0.84                   | 0.00                      | 0.36                        | 0.87     | 0.00                 | 0.77                          |
| 20                             | 0.77                   | 0.00                      | 0.34                        | 0.85     | 0.00                 | 0.71                          |
| 50                             | 0.63                   | 0.62                      | 0.17                        | 0.69     | 0.00                 | 0.59                          |
